# Supplementary material for: Fe1−xS@S-doped carbon core–shell heterostructured hollow spheres as highly reversible anode materials for sodium ion batteries
Source: Royal Society of Chemistry journal article supplement (doi:10.1039/c9ta07302g), 2019-01-01
Supplement: c9ta07302g5.pdf [file c9ta07302g5.pdf]

# **Fe<sub>1-x</sub>S@S-Doped Carbon Core-Shell Heterostructured Hollow Spheres as Highly Reversible Anode Materials for Sodium Ion Batteries**

Qichang Pan,<sup>a</sup> Fenghua Zheng,<sup>a\*</sup> Yanzhen Liu,<sup>a</sup> Youpeng Li,<sup>a</sup> Wentao Zhong,<sup>a</sup> Guilin Chen,<sup>a</sup> Junhua Hu,<sup>b</sup> Chenghao Yang,<sup>a\*</sup> Meilin Liu<sup>ac</sup>

<sup>a</sup>Guangdong Engineering and Technology Research Center for Surface Chemistry of Energy Materials, New Energy Research Institute, School of Environment and Energy, South China University of Technology, Guangzhou 510006, PR China

<sup>b</sup>School of Materials Science and Engineering, Zhengzhou University, Zhengzhou 450001, China

<sup>c</sup>School of Materials Science & Engineering, Georgia Institute of Technology, Atlanta 30332-0245, Georgia

\* Email: Chenghao Yang, [esyangc@scut.edu.cn](mailto:esyangc@scut.edu.cn);

Fenghua Zheng, [zhengfh870627@163.com](mailto:zhengfh870627@163.com)

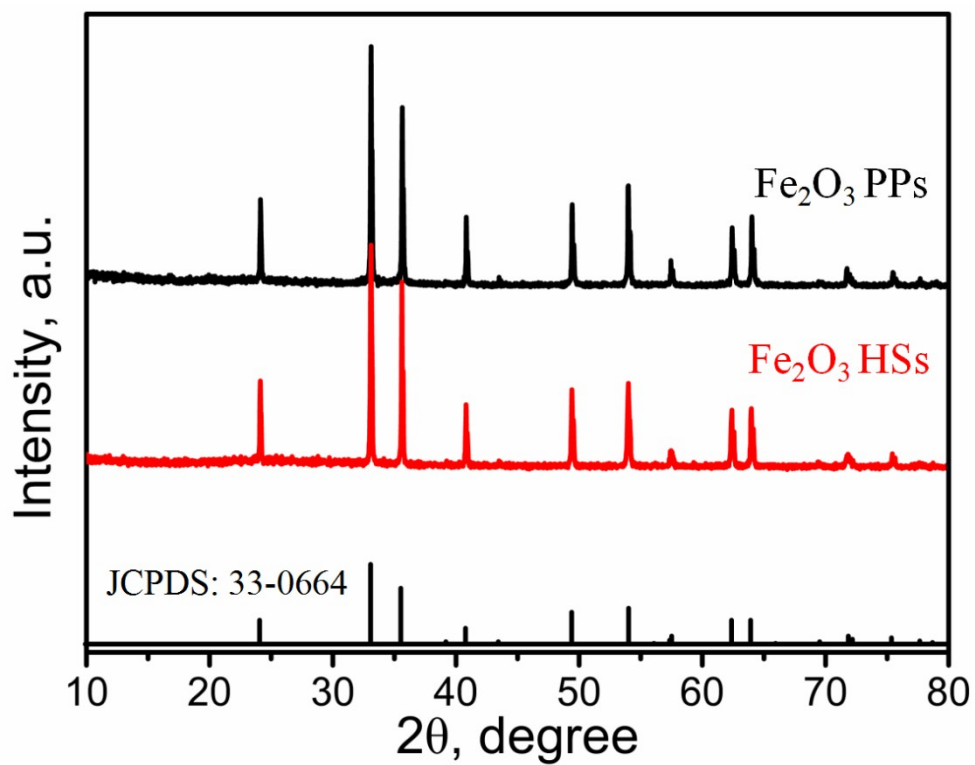

**Figure S1** XRD patterns of Fe<sub>2</sub>O<sub>3</sub> hollow spheres (Fe<sub>2</sub>O<sub>3</sub> HSs) and Fe<sub>2</sub>O<sub>3</sub> polyhedral nanoparticles (Fe<sub>2</sub>O<sub>3</sub> PPs).

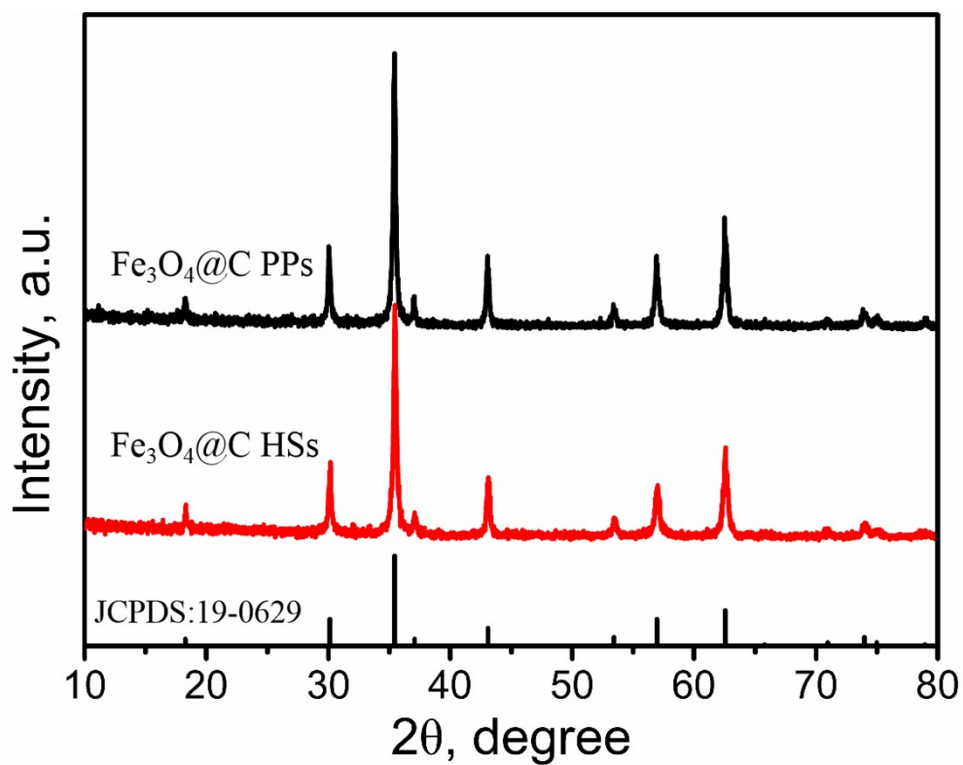

**Figure S2** XRD patterns of Fe<sub>3</sub>O<sub>4</sub>@C HSs and Fe<sub>3</sub>O<sub>4</sub>@C PPs.

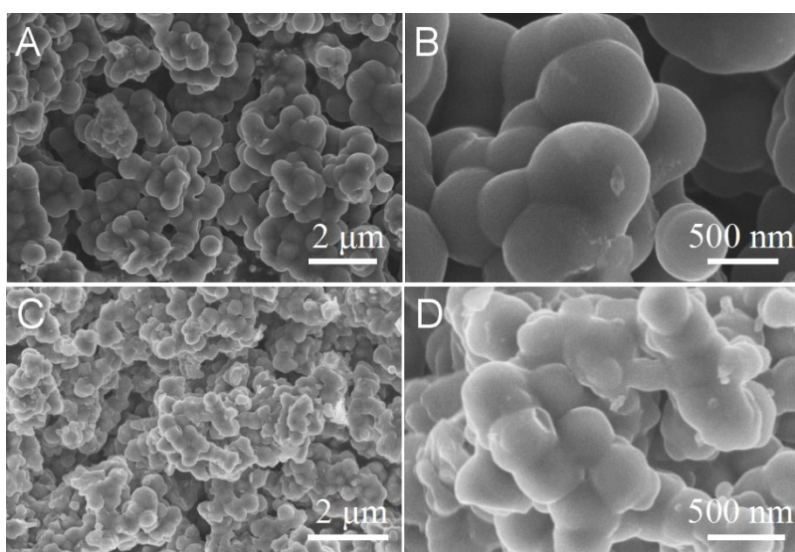

**Figure S3** SEM images of (A, B) Fe<sub>3</sub>O<sub>4</sub>@C HSs and (C, D) Fe<sub>3</sub>O<sub>4</sub>@C PPs,

respectively.

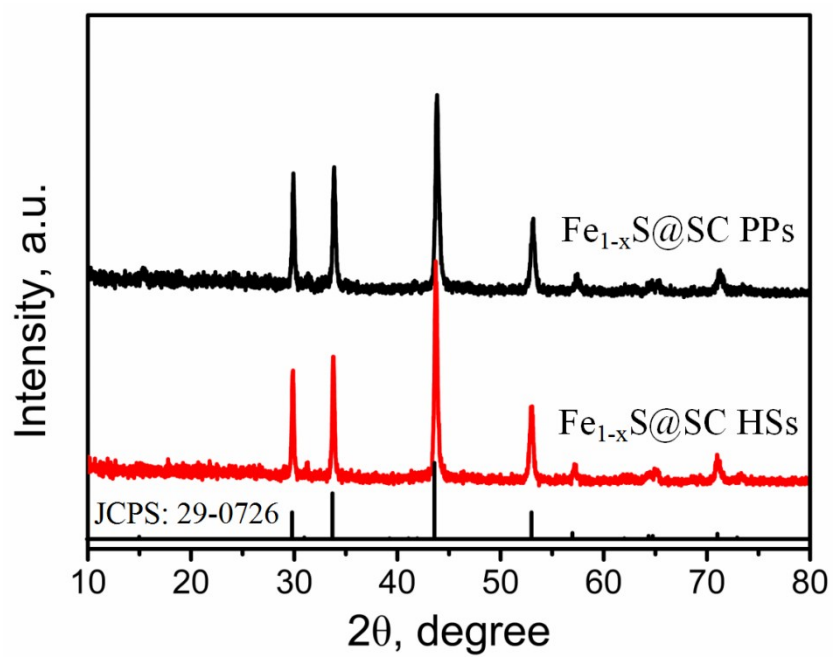

**Figure S4** XRD patterns of (A) Fe<sub>1-x</sub>S@SC HSs and (B) Fe<sub>1-x</sub>S@SC PPs.

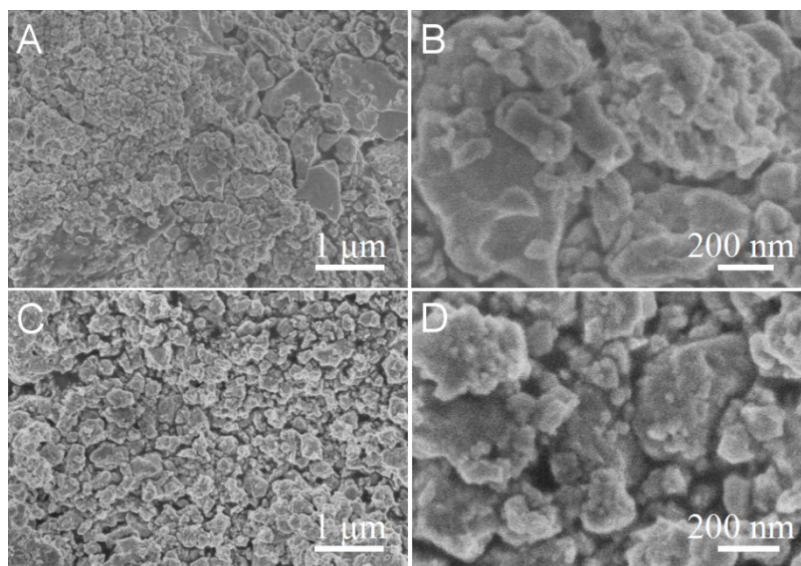

**Figure S5** SEM images of pure S-Fe<sub>1-x</sub>S (A, B), and P-Fe<sub>1-x</sub>S (C, D) composite, respectively.

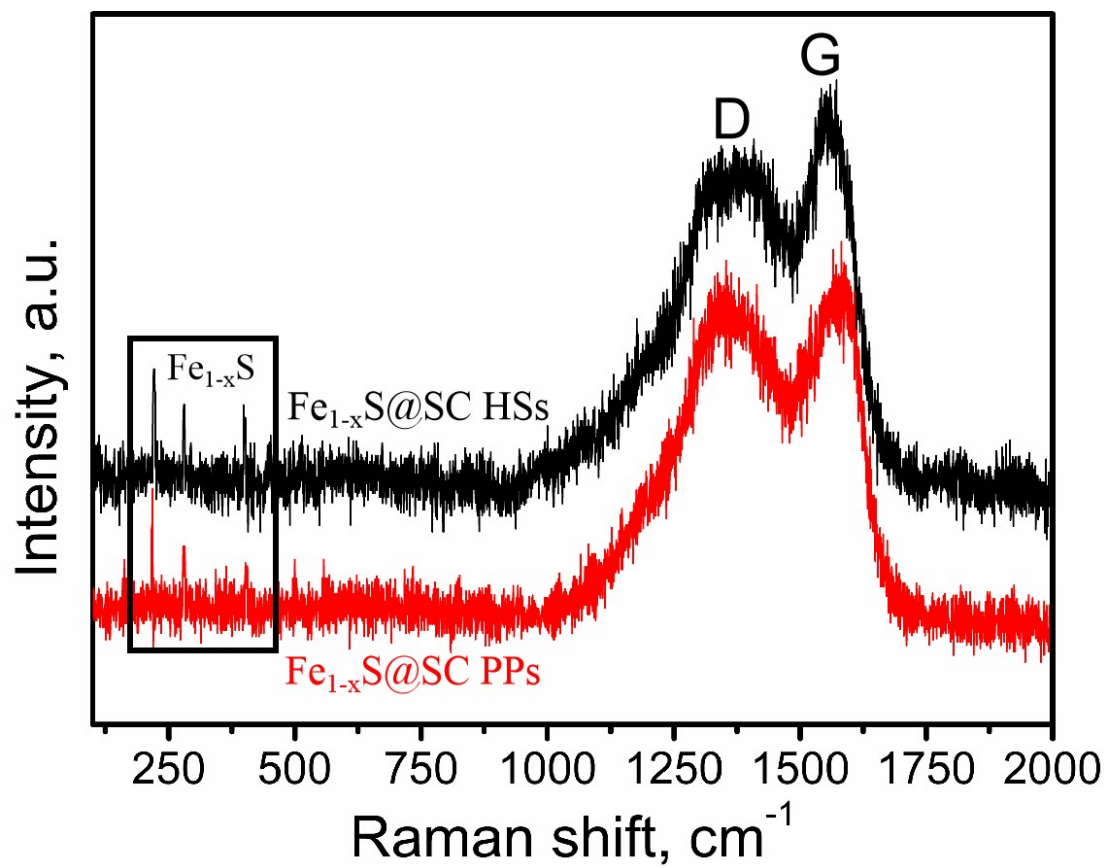

**Figure S6** Raman spectra of  $\text{Fe}_{1-x}\text{S@SC HSs}$  and  $\text{Fe}_{1-x}\text{S@SC PPs}$ .

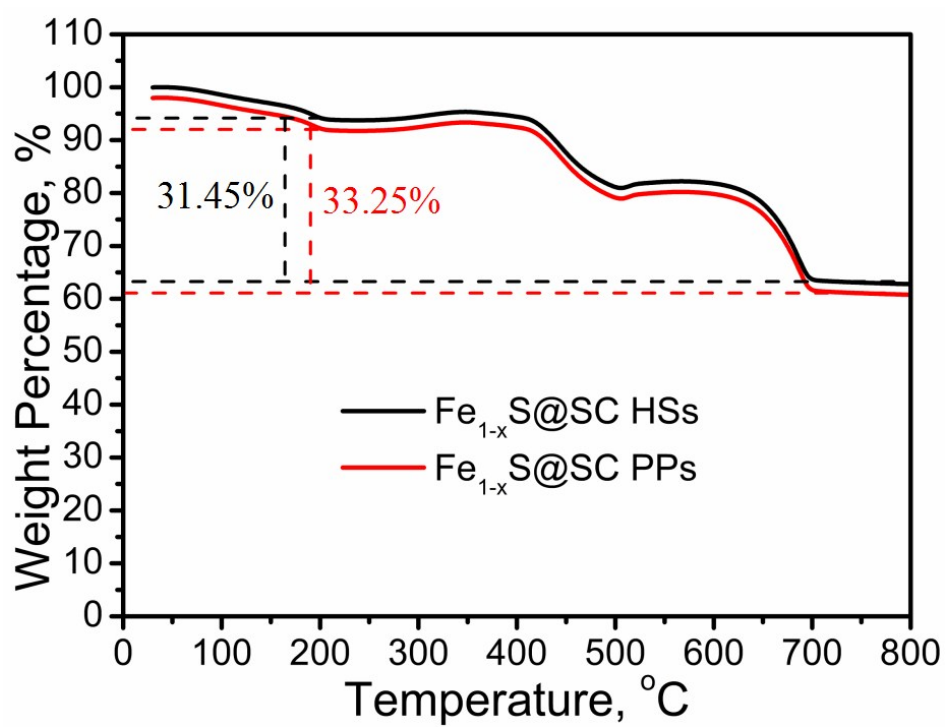

**Figure S7** TGA curves of  $\text{Fe}_{1-x}\text{S@SC HSs}$  and  $\text{Fe}_{1-x}\text{S@SC PPs}$ .

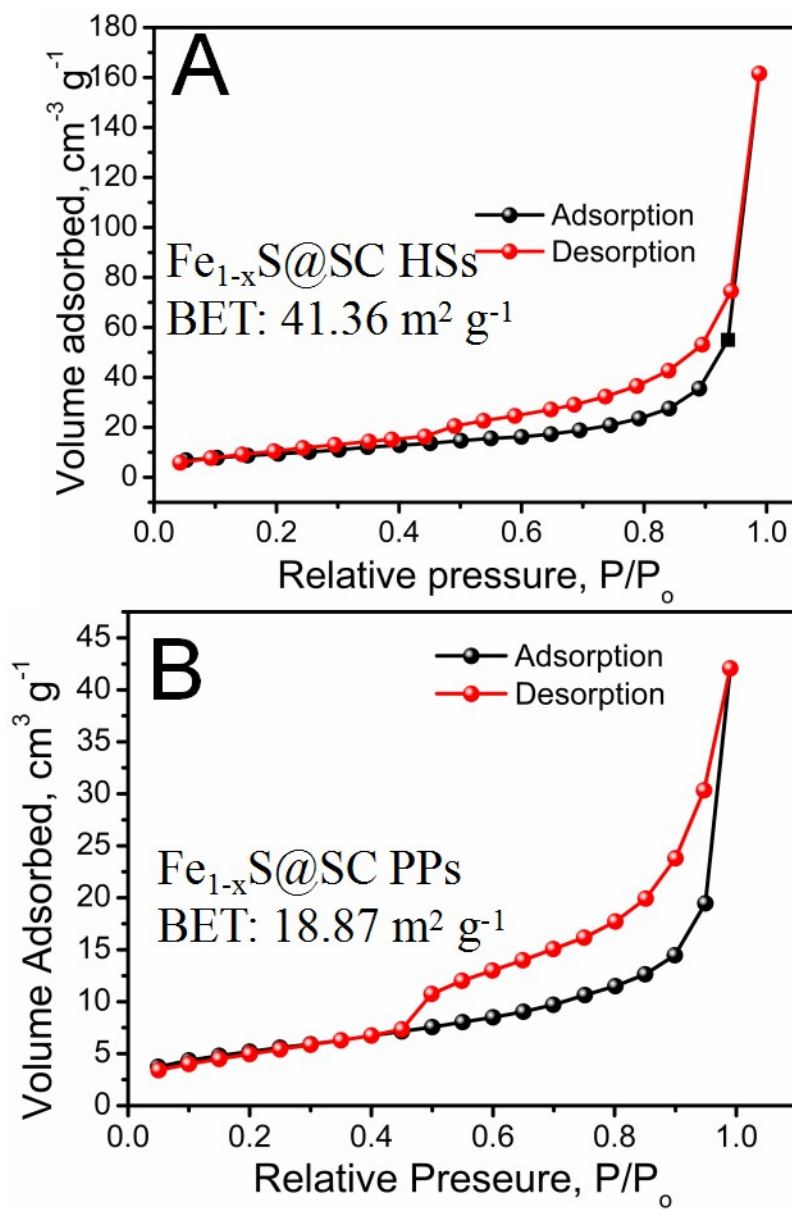

**Figure S8** Nitrogen adsorption-desorption isotherm curves of (A)  $\text{Fe}_{1-x}\text{S}@SC$  HSs and (B)  $\text{Fe}_{1-x}\text{S}@SC$  PPs.



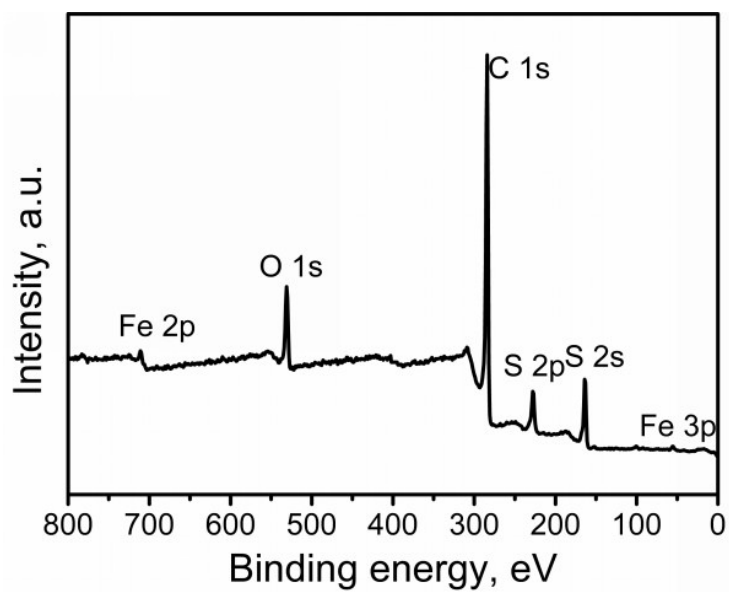

**Figure S9** Survey XPS spectra of  $\text{Fe}_{1-x}\text{S}@SC$  HSs.

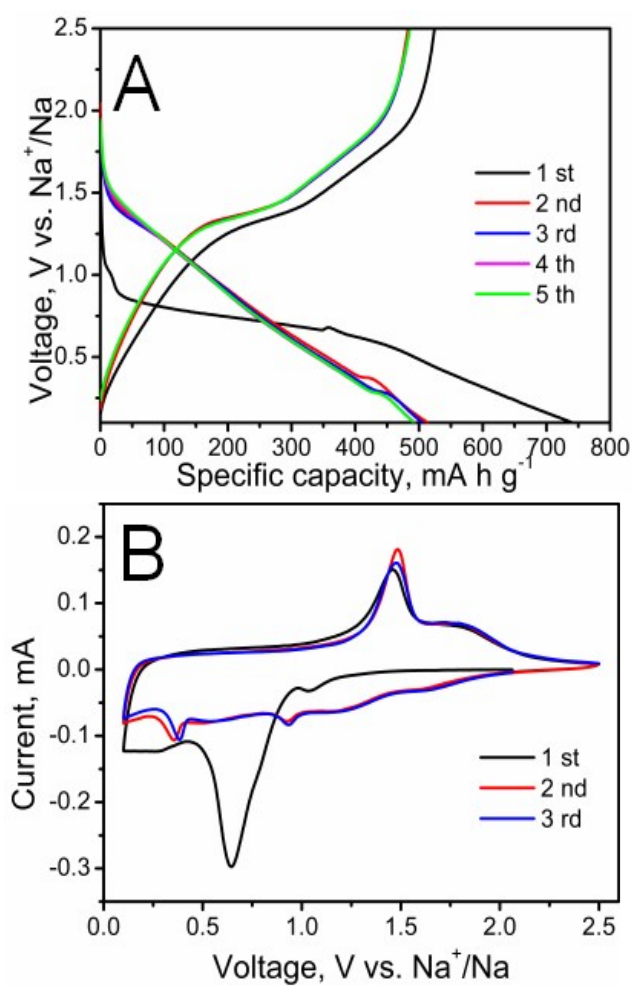

**Figure S10** (A) Charge and discharge profiles and (B) CV curves of  $\text{Fe}_{1-x}\text{S}@SC$  PPs electrode.

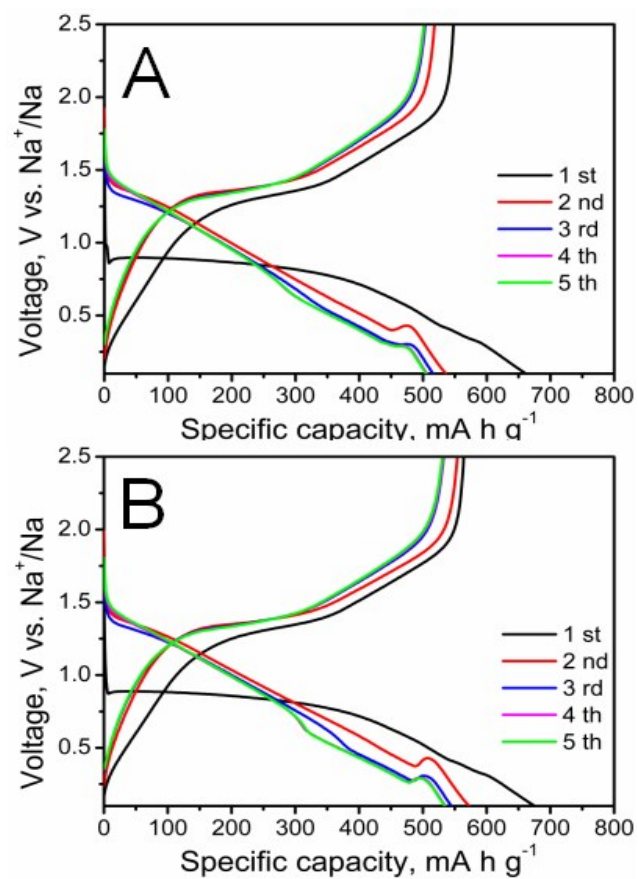

**Figure S11** Charge and discharge profiles of pure S-Fe<sub>1-x</sub>S (A) and P-Fe<sub>1-x</sub>S (B) electrode.

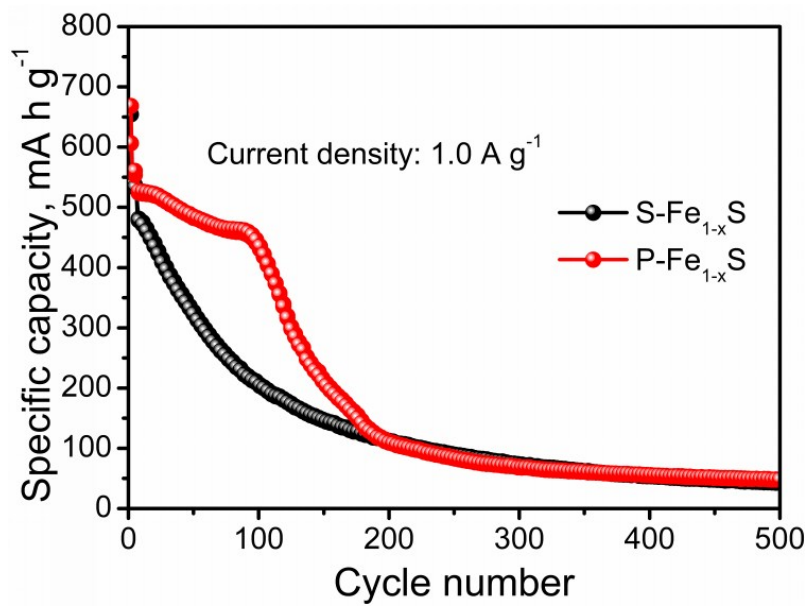

**Figure S12** Cycle performance of pure S-Fe<sub>1-x</sub>S, and P-Fe<sub>1-x</sub>S electrode at 1.0 A g<sup>-1</sup>.

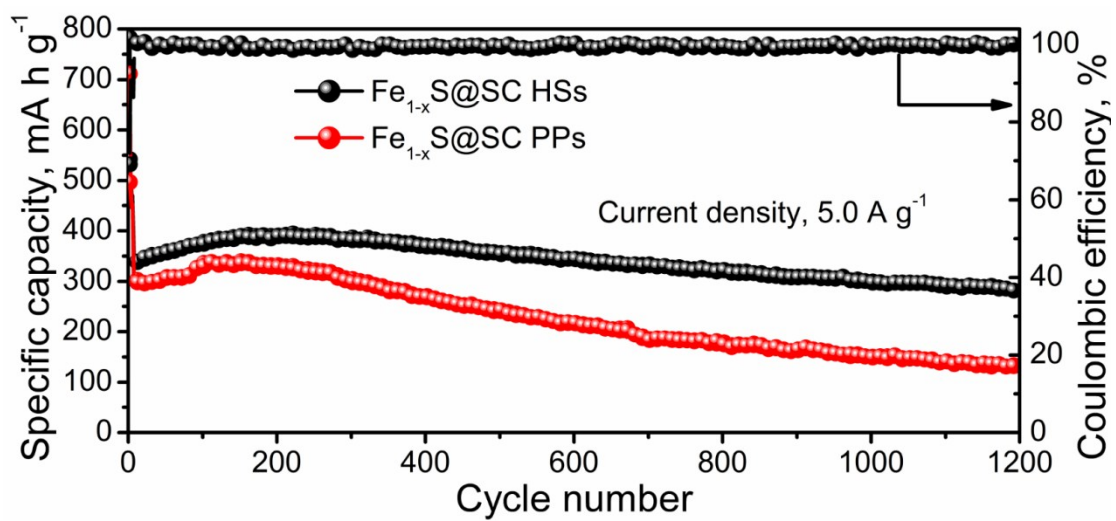

**Figure S13** Cycle performance of  $\text{Fe}_{1-x}\text{S@SC HSs}$  and  $\text{Fe}_{1-x}\text{S@SC PPs}$  at  $5.0 \text{ A g}^{-1}$ .

**Table S1. Comparison of the electrochemical performance of Fe<sub>1-x</sub>S@SC HSs and F<sub>1-x</sub>S@SC PPs with that of reported iron sulfides-based anode materials.**

| Sample                     | Capacity, mA h g <sup>-1</sup> | Cycle number, n | Current density, mA g <sup>-1</sup> | Reference |
|----------------------------|--------------------------------|-----------------|-------------------------------------|-----------|
| FeS@Fe <sub>3</sub> C@GC   | 219.8                          | 200             | 1.0                                 | 15        |
| 3DG/FeS@C                  | 358                            | 300             | 1.0                                 | 17        |
| FeS/CA                     | 280                            | 200             | 0.5                                 | 20        |
| Fe <sub>1-x</sub> S@CNTs   | 449.2                          | 200             | 0.5                                 | 21        |
| porous FeS nanofibers      | 592                            | 150             | 0.5                                 | 27        |
| Fe <sub>1-x</sub> S@NC@G   | 385                            | 500             | 0.2                                 | 36        |
| CL-C/FeS                   | 265                            | 200             | 1.0                                 | 37        |
| FeS <sub>x</sub> @CS       | 638.9                          | 100             | 0.1                                 | 38        |
| FeS-rGO                    | 547                            | 50              | 0.1                                 | S1        |
| FeS@C-N                    | 354.5                          | 500             | 0.1                                 | S2        |
| FeS/CFs                    | 283                            | 400             | 1.0                                 | S3        |
| Fe <sub>1-x</sub> S@SC PPs | 286                            | 500             | 1.0                                 | This work |
| Fe <sub>1-x</sub> S@SC HSs | 454.3                          |                 |                                     |           |

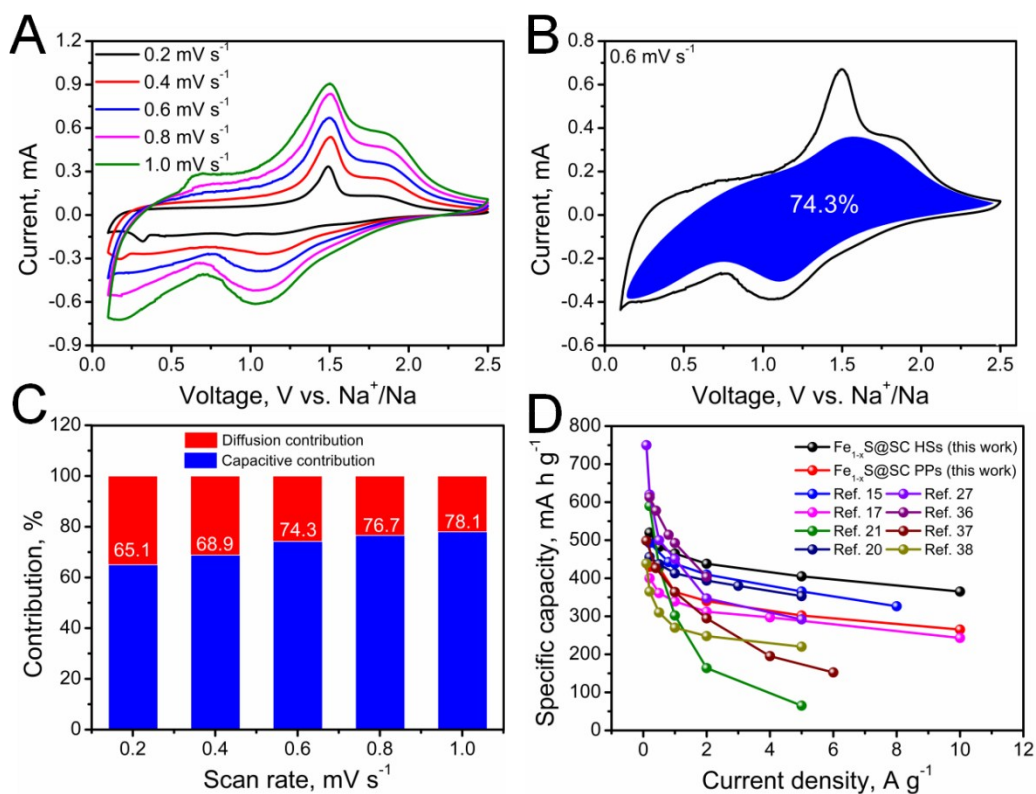

**Figure S14** CV curves at various scan rates from 0.2 to 1.0 mV s<sup>-1</sup> (A), capacitive contribution at 0.8 mV s<sup>-1</sup> (B), and normalized contribution ratio of capacitive (blue) and diffusion (red) capacities at different scan rates (C) of Fe<sub>1-x</sub>S@SC HSs electrode; comparison of the rate capability of this work with previously reported iron sulfides anodes for SIBs (D).

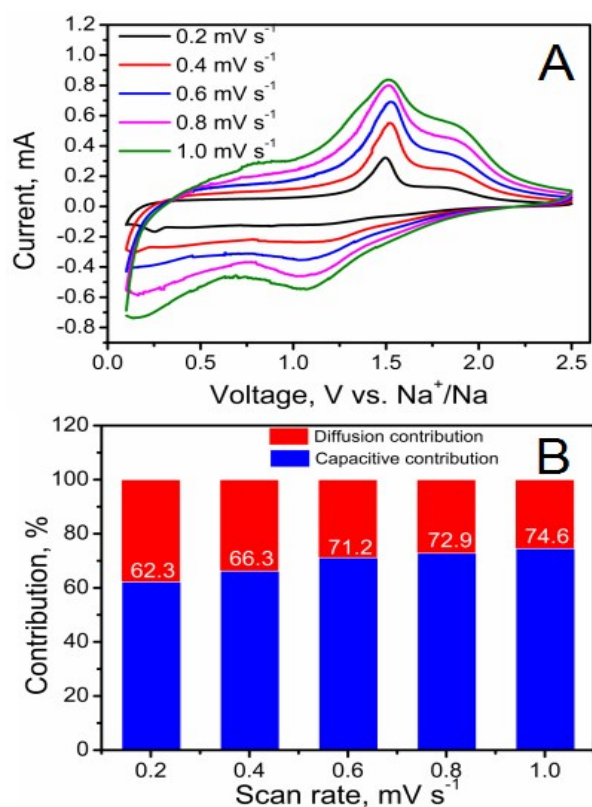

**Figure S15** CV curves at various scan rate from 0.2 to 1.0  $\text{mV s}^{-1}$  for  $\text{Fe}_{1-x}\text{S@SC}$  PPs electrode (A), normalized contribution ratio of capacitive (blue) and diffusion (red) capacities at different scan rates for  $\text{Fe}_{1-x}\text{S@SC}$  PPs (B) .

To further understand the high rate capability of the  $\text{Fe}_{1-x}\text{S@SC}$  HSs, the capacitive behaviors of the sample was investigated. Figure S15A exhibits the CV curves of  $\text{Fe}_{1-x}\text{S@SC}$  HSs electrode at various scan rates range from 0.2 to 1.0  $\text{mV s}^{-1}$ . To analyzed the degree of capacitive effect, the following relationship were carried out:  $i = av^b$ , where  $i$  is the peak current corresponding to a particular scan rate ( $v$ ),  $a$  and  $b$  are both constants.[S4,S5] Subsequently, the percentage of capacitive and diffusion contributions were determined based on the following equation:  $i(V) = k_1v^{1/2} + k_2v$ . And the equation can be further transformed to the following equation:  $i(V)/v^{1/2} = k_1 + k_2v^{1/2}$ .  $k_1$  and  $k_2$  can be facilely achieved by plotting  $i(V)/v^{1/2}$  vs  $v^{1/2}$ , and thus the

capacitive current  $i_c (V) = k_2v$  could be extracted from the total one with the value of  $k_2$ . [S6] As a result, at a given  $0.6 \text{ mV s}^{-1}$  sweep rate, the CV profile for the capacitive current compared with that of the total measured current is shown in Figure S15B, in which 74.3% is quantified as capacitive. Therefore, the capacitive contributions at 0.2, 0.4, 0.8 and  $1.0 \text{ mV s}^{-1}$  were also can be measured, and we summarizes the capacitive contributions at various scan rates, the results as shown in Figure S15C. The capacitive contributions are 65.1%, 68.9%, 74.3%, 76.7%, and 78.1% at scan rates of 0.2, 0.4, 0.6, 0.8, and  $1.0 \text{ mV s}^{-1}$ , respectively. On the other hand, the capacitive contributions at different scan rates for  $\text{Fe}_{1-x}\text{S@SC}$  PPs electrode were also investigated based on the same method. Figure S16A shows the CV curves at various scan rates from 0.2 to  $1.0 \text{ mV s}^{-1}$  for  $\text{Fe}_{1-x}\text{S@SC}$  PPs electrode, respectively. And all of the curves at different scan rates exhibit similar shapes, which match well with the  $\text{Fe}_{1-x}\text{S@SC}$  HSs electrode. The capacitive contributions at different scan rates for P- $\text{Fe}_{1-x}\text{S@SC}$  electrode were also determined, and the result as shown in Figure S16B. It is worth noting that the  $\text{Fe}_{1-x}\text{S@SC}$  HSs electrode exhibits higher capacitive contribution than the  $\text{Fe}_{1-x}\text{S@SC}$  PPs electrode, which indicate that the  $\text{Fe}_{1-x}\text{S@SC}$  HSs electrode shows more outstanding rate capability compare to  $\text{Fe}_{1-x}\text{S@SC}$  PPs electrode, and match well with the rate test results. [S7] Finally, the rate capability of  $\text{Fe}_{1-x}\text{S@SC}$  HSs electrode compare to the previously reported iron sulfides anodes for SIBs were summarized (Figure S15D), and suggested that  $\text{Fe}_{1-x}\text{S@SC}$  PPs electrode exhibits better rate performance compare to most of previously reported iron sulfides anodes.



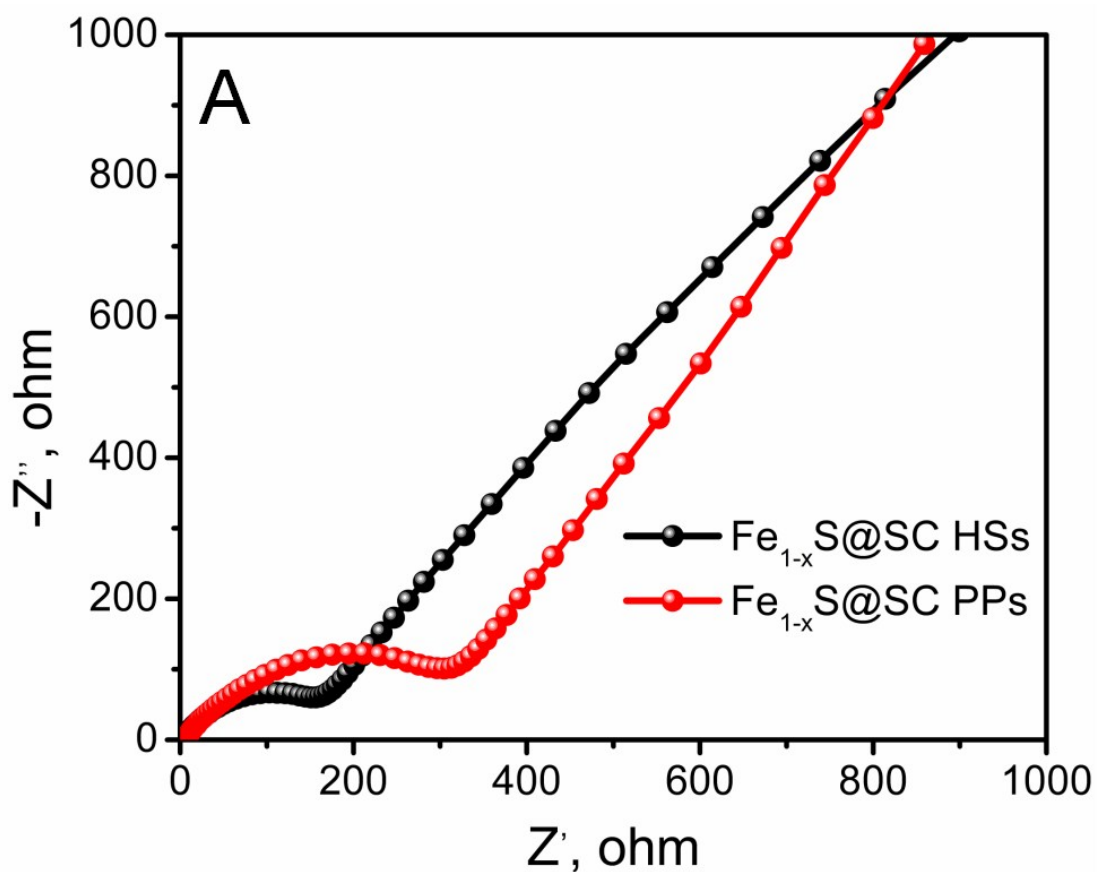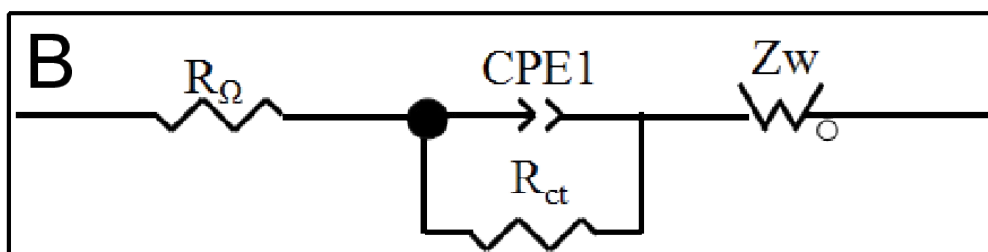

**Figure S16** Nyquist plots of as-prepared S-Fe<sub>1-x</sub>S@SC and P-Fe<sub>1-x</sub>S@SC electrode (A), and the equivalent circuit model used for fitting the experimental EIS data (B).

**Table S2** Impedance parameters obtained from equivalent circuit model (Figure S16) for Fe<sub>1-x</sub>S@SC HS sand Fe<sub>1-x</sub>S@SC PPs based electrode.

| Sample                     | R <sub>Ω</sub> (Ω) | R <sub>ct</sub> (Ω) | D <sub>Na<sup>+</sup></sub> (cm <sup>2</sup> s <sup>-1</sup> ) |
|----------------------------|--------------------|---------------------|----------------------------------------------------------------|
| Fe <sub>1-x</sub> S@SC HSs | 4.8                | 158.5               | 6.51×10 <sup>-12</sup>                                         |
| Fe <sub>1-x</sub> S@SC PPs | 7.63               | 345.3               | 2.95×10 <sup>-12</sup>                                         |

Figure S16 shows the electrochemical impedance spectroscopy (EIS) of Fe<sub>1-x</sub>S@SC HSs and Fe<sub>1-x</sub>S@SC PPs based electrode. The ohmic resistance ( $R_{\Omega}$ ) and charge transfer resistance ( $R_{ct}$ ) can be obtained by data fitting according to the equivalent circuit model in Figure S16B, the results are listed in Table S1. The Na<sup>+</sup> diffusion coefficient ( $D_{Na^+}$ ) could be calculated based on Eqs. (S1) and (S2):

$$Z' = R_{\Omega} + R_{ct} + \sigma\omega^{-0.5} \quad (S1)$$

$$D_{Na^+} = \frac{(RT)^2}{2(An^2F^2C_{Na^+}\sigma)^2} \quad (S2)$$

where R, T, A, n, F, C and  $\sigma$  are the gas constant, absolute temperature, contact area of the electrode, number of electrons per molecule during oxidation, Faraday constant, concentration of Na-ions, and Warburg coefficient, respectively.[S8, S9] As a result, the Na<sup>+</sup> ions diffusion coefficient of Fe<sub>1-x</sub>S@SC HSs and Fe<sub>1-x</sub>S@SC PPs are  $6.51 \times 10^{-12}$  and  $2.95 \times 10^{-12}$ , respectively (Table S1). The Fe<sub>1-x</sub>S@SC HSs based electrode exhibits a much higher Na<sup>+</sup> ions diffusion coefficient, and it confirms that the heterostructured hollow spheres can significantly facilitates Na<sup>+</sup> ions diffusion.[S10]

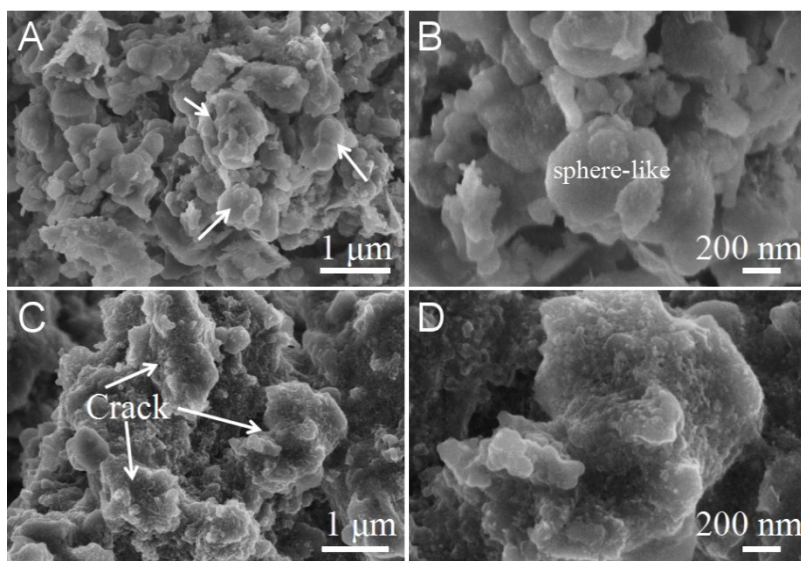

**Figure S17** SEM images of  $\text{Fe}_{1-x}\text{S}@SC$  HSs (A, B), and  $\text{Fe}_{1-x}\text{S}@SC$  PPs (C, D) after 500 cycles at  $1.0 \text{ A g}^{-1}$ , respectively.

The morphologies of  $\text{Fe}_{1-x}\text{S}@SC$  HSs and  $\text{Fe}_{1-x}\text{S}@SC$  HSs electrode after long cycles were studied for structural changes. Figure S16 revealed that the SEM images of  $\text{Fe}_{1-x}\text{S}@SC$  HSs and  $\text{Fe}_{1-x}\text{S}@SC$  PPs electrode after 500 cycles at  $1.0 \text{ A g}^{-1}$ . Figure S16A and S16B clearly show that the sphere-like structures are almost maintained in the  $\text{Fe}_{1-x}\text{S}@SC$  HSs electrode after 500 cycles. But for  $\text{Fe}_{1-x}\text{S}@SC$  PPs electrode, polyhedral particles cracked can be obtained after 500 cycles (Figure S16C and S16D). Therefore, these results further strongly indicated that the S-doped carbon shell and hollow structure can effectively accommodate the large volume change of  $\text{Fe}_{1-x}\text{S}$  and maintain the structural stability during the cycling process.

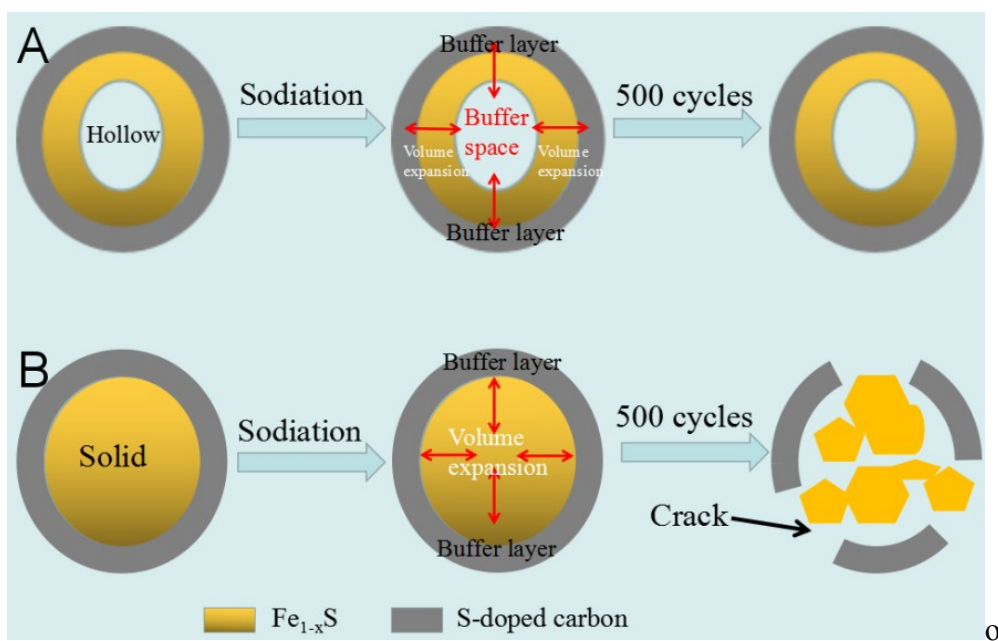

**Figure S18** Schematic illustration of Fe<sub>1-x</sub>S@S-doped carbon electrodes during cycling.

## References

- [S1] S. Y. Lee, Y. C. Kang, Sodium-Ion Storage Properties of FeS-Reduced GrapheneOxide Composite Powder with a Crumpled Structure, *Chem. Eur. J.*, 2016, 22, 2769-2774.
- [S2] Z. G. Wu, J. T. Li, Y. J. Zhong, J. Liu, K. Wang, X. D. Guo, L. Huang, B. H. Zhong, S. G. Sun, Synthesis of FeS@C-N hierarchical porous microspheres for the applications in lithium/sodium ion batteries, *J. Alloy. Compd.*, 2016, 688, 790-797.
- [S3] D. H. Li, Y. Y. Sun, S. Chen, J. Y. Yao, Y. H. Zhang, Y. Z. Xia, D. J. Yang, Highly Porous FeS/Carbon Fibers Derived from Fe-Carrageenan Biomass: High-capacity and Durable Anodes for Sodium-Ion Batteries, *ACS Appl. Mater. Interfaces*, 2018, 10, 17175-17182.
- [S4] Q. B. Guo, Y. F. Ma, T. T. Chen, Q. Y. Xia, M. Yang, H. Xia, Y. Yu, Cobalt Sulfide Quantum Dot Embedded N/S-Doped Carbon Nanosheets with Superior Reversibility and Rate Capability for Sodium-Ion Batteries, *ACS Nano* 2017, 11, 12658-12667.
- [S5] K. Zhang, M. H. Park, L. M. Zhou, G. H. Lee, W. J. Li, Y. M. Kang, J. Chen, Urchin-Like CoSe<sub>2</sub> as a High-Performance Anode Material for Sodium-Ion Batteries, *Adv. Funct. Mater.* 2016, 26, 6728-6735.
- [S6] X. J. Xu, J. Liu, Z. B. Liu, J. D. Shen, R. Z. Hu, J. W. Liu, L. Z. Ouyang, L. Zhang, M. Zhu, Robust Pitaya-Structured Pyrite as High Energy Density Cathode for High-Rate Lithium Batteries. *ACS Nano*, 2017, 11, 9033-9040.
- [S7] X. Xu, R. S. Zhao, W. Ai, B. Chen, H. F. Du, L. S. Wu, H. Zhang, W. Huang, T.

Yu, Controllable Design of MoS<sub>2</sub>Nanosheets Anchored on Nitrogen-Doped Graphene: Toward Fast Sodium Storage by Tunable Pseudocapacitance, *Adv. Mater.* 2018, 30, 1800658.

[S8] F. H. Zheng, Q. Deng, W. T. Zhong, X. Ou, Q. C. Pan, Y. Z. Liu, X. H. Xiong, C. H. Yang, Y. Chen, and M. L. Liu, Fluorine-Doped Carbon Surface Modification of Li-Rich Layered Oxide Composite Cathodes for High Performance Lithium-Ion Batteries, *ACS Sustainable Chem. Eng.* 2018, 6, 16399–16411.

[S9] Y. Z. Liu, W. T. Zhong, C. H. Yang, Q. C. Pan, Y. P. Li, G. Wang, F. H. Zheng, X. H. Xiong, M. L. Liu and Q. Y. Zhang, Direct synthesis of FeS/N-doped carbon composite for high-performance sodium-ion batteries, *J. Mater. Chem. A*, 2018, 6, 24702-24708.

[S10] Q. C. Pan, Y. G. Huang, H. Q. Wang, G. H. Yang, L. C. Wang, J. Chen, Y. H. Zan, Q. Y. Li, MoS<sub>2</sub>/C nanosheets Encapsulated Sn@SnO<sub>x</sub> nanoparticles as high-performance Lithium-ion battery anode material, *Electrochim. Acta* 197 (2016) 50-57.
